# Supplementary material for: Structure, modelling and dynamic behaviour of aza- and azaoxamacrocyclic ligands derived from (R,R)-1,2-diaminocyclohexaneElectronic supplementary information (ESI) available: different views of compounds 6, 6a and 6b. See http://www.rsc.org/suppdata/ob/b3/b306963j/
Source: Royal Society of Chemistry journal article supplement (doi:10.1039/b306963j), 2003-01-01
Supplement: b306963j.doc [file b306963j.doc]

**Supplementary Information**


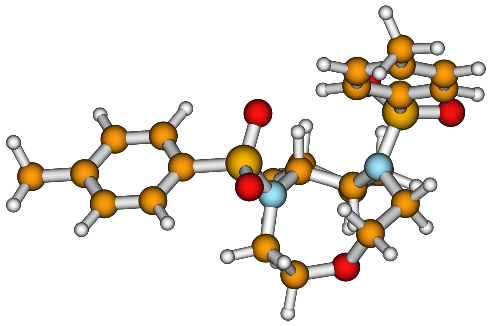


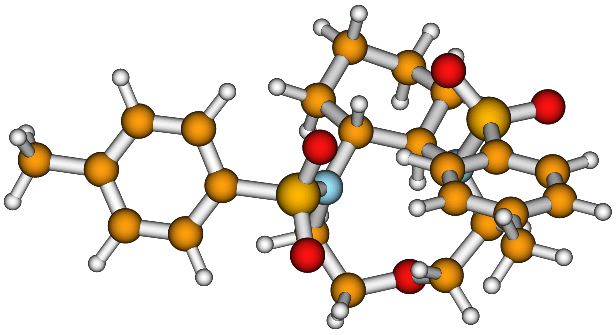


**Supplementary Information 1.** Different views of the *C*1-symmetric conformer of **6**.

| 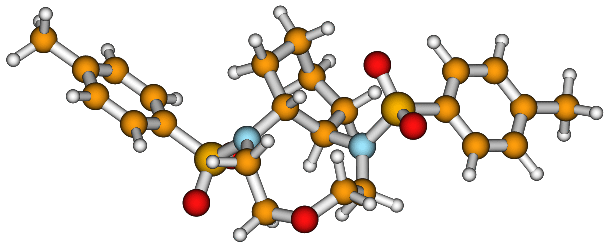  Conformer *C*2-**6a** |
| --- |
| 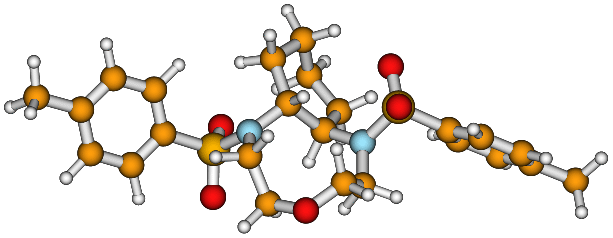 |

Conformer *C*2-**6b**

**Supplementary Information 2.** Alternative views of *C*2-symmetric conformers of **6** in which the distorted conformation of the 6-membered ring can be appreciated.
